# Supplementary material for: A Locus Controlling Leaf Rolling Degree in Wheat under Drought Stress Identified by Bulked Segregant Analysis
Source: MDPI journal article supplement (doi:10.3390/plants11162076), 2022-08-09
Supplement: s1 [file s1]

The following are the supplementary data related to this article.

Figure S1. Stomatal morphology on the abaxial surface of AK58 and ZM36 leaves under drought stress.

Figure S2. Leaf rolling degree of the F<sub>2</sub> population.

Figure S3. Molecular phylogeny of TraesCS7A02G543300 and related bHLHs.

Table S1. Annotations of genes predicted in the candidate region on chromosome 7A.

Table S2. Primers used in this study.

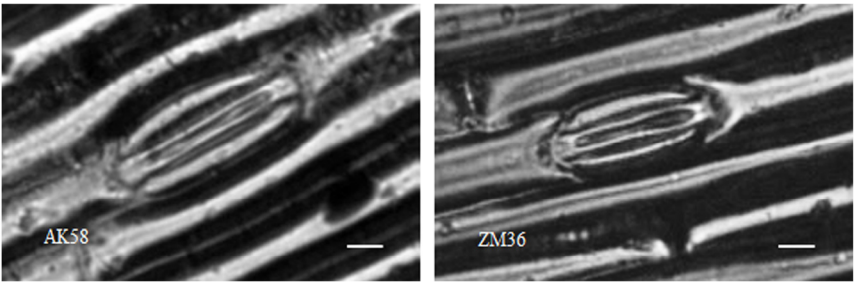

Figure S1. Stomatal morphology on the abaxial surface of AK58 and ZM36 leaves under drought stress. Scale bars=10  $\mu$ m.

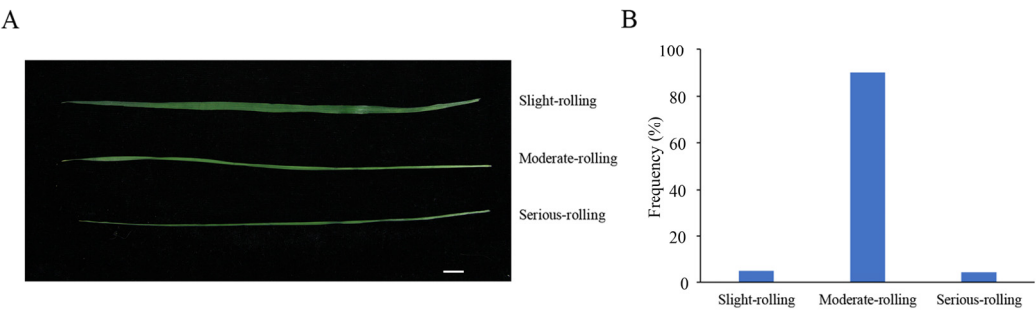

Figure S2. Leaf rolling degree of the F<sub>2</sub> population.

(A) Criteria for grading leaf rolling degree. (Scale bar, 1 cm.). (B) Frequency distribution of leaf rolling degree in the F<sub>2</sub> population derived from a cross of AK58×ZM36 under drought stress.

|                    |                                                                                  |     |
|--------------------|----------------------------------------------------------------------------------|-----|
| TraesCS7A01G543300 | MELDEQA.FLEELFSLRRDATAAEECN.....AMGDFFSFACAGAAA                                  | 41  |
| AtbHLH093          | MELSTQMNVFEEILLVPTKQETDNNINLS.....FNGGFDHHHQFFPNGYN                              | 48  |
| AtICE1/SCRM        | MGLDGNNGGGVWLNNGGGEREN...EEGSGWRNQEDGSSQFKPMLEGDFWSSNQPHPDQLQMLQNPDPFRYPGGFFPNPN | 78  |
| AtSCRM2            | MNSDGVWLDGSGEISPEVNNCEAASVVRNPDE.....DWFEN.NPPFPQ....HTNQDFFRNGGFPPLNS           | 59  |
| TraesCS7A01G543300 | MD..CF..QERHQPTVSVLPTFTASFDHPQ.....QQAGVTAGGFDCLESEVYGGGFP.....                  | 91  |
| AtbHLH093          | IDYLCFNNEEDENTLLYSSFMDLISQPPPLL.....HQPPPLQPLSPPLSSSATAGATD.....                 | 106 |
| AtICE1/SCRM        | DN..LLQHSIDSSSSCSPS.QAFSLDPSQQNQ.....FLSTNNKGCCLNVPSSAN.PEDNAFEFGSESGLFNC        | 144 |
| AtSCRM2            | ENLLLLQQSIDSSSSSPLLHPTLDAASQQQQQQQQEQSFLATKACIVSLNVPITNNNTD...DFGFDSSGLGQ        | 136 |
| TraesCS7A01G543300 | .....NAVGGYGEMG                                                                  | 102 |
| AtbHLH093          | .....YPTLEALQETI                                                                 | 117 |
| AtICE1/SCRM        | IHAPISMGFGLTQLGNRDLSSVDPFLSARSLAPESNNNTMLCGGFTAPLELEGFGSPANGGFVGNRAKVLKPLEVLA    | 224 |
| AtSCRM2            | QFHGHQSPNSMNFGLN...HSVPDFLPA....PE...NSSGSCG.....LSPLFSNRAKVLKPLEVMA             | 191 |
| TraesCS7A01G543300 | FLAAMDPKAAAAALVEGGGLGACKVEPGLAAVDGGA.....FGSAVPAPASRK.....KK                     | 153 |
| AtbHLH093          | DSSSSPPLILQNGQEENFNPNMSPSPLMESDQSKS.....FSVCYCGGETNKKK.....SKK                   | 171 |
| AtICE1/SCRM        | SSGAQPTLFQKRAAMRQSSSGSKMNSSESG.MRRFSDDGDMDETG...IEVSGLNYESDEINESGKAESVQIGGGGKKG  | 300 |
| AtSCRM2            | SSGSQPTLFQKRAAMRQSSSSKMCNSESSEMRKSSYVEREIDDTSTGIIDISGLNYESDDHNTNN.....NKGK       | 260 |
|                    | basic Helix Loop Helix                                                           |     |
| TraesCS7A01G543300 | VGCMPSKNLMAERRRRRRLNDRLSMLRSVVPKISKMDRTSILGDAIDYMKELLERIRRLQEEEMEP.....HAGPAA    | 225 |
| AtbHLH093          | LGQPSKNLMAERRRRRRLNDRLSMLRSIVPKISKMDRTSILGDAIDYMKELLDRINKLQDEEQLGN.....SNNSHH    | 245 |
| AtICE1/SCRM        | KKCMPSKNLMAERRRRRRLNDRLYMLRSVVPKISKMDRASILGDAIDYMKELLQRINDLHNELESTPPGSLPPTSSSFHP | 380 |
| AtSCRM2            | KKCMPSKNLMAERRRRRRLNDRLYMLRSVVPKISKMDRASILGDAIDYMKELLQRINDLHTELESTPP.....SSSLHP  | 335 |
| TraesCS7A01G543300 | APLLSVFRELNPNEMLAR.....NTPKFEVERKE.EDTRVEIYCAAKPGLLLSTVSTLDTLGLDIOCCVVSCEFNDE    | 295 |
| AtbHLH093          | SKLFGDLKDLNANEPILVR.....NSPKFEIDRRD.EDTRVDICSPKPGLLSTVNTLETGLGLEIEQCVISCEFSDE    | 315 |
| AtICE1/SCRM        | LTPTPQTLSCRVKEPLCF.SSLPSPKGGQARVEVRLREGRAVNIHMFGRRRPGLLLATMKALDNLGLDVOQAVISCENGE | 459 |
| AtSCRM2            | LTPTPQTLSYRVKEPLCFSSSLPSPKGGQARVEVRLREGRAVNIHMFGRRRPGLLLSTMRALDNLGLDVOQAVISCENGE | 415 |
| TraesCS7A01G543300 | AMHASCSE..MQREMISADAIKQELFKNAGYGGGC                                              | 328 |
| AtbHLH093          | SLQASCSEGAEQRFITSEDIKQAEERNAGYGGSC                                               | 350 |
| AtICE1/SCRM        | ALDVFRABQCQEGQEILPDQIKAVLEDTAGYAGMI                                              | 494 |
| AtSCRM2            | ALDVFRABQCQEDHDVLFPEQIKAVLEDTAGYAGLV                                             | 450 |

Figure S3. Amino acid sequence alignment of SCRM homologs.

Table S1. Annotations of genes predicted in the candidate region on chromosome 7A

| Gene ID            | Description                              |
|--------------------|------------------------------------------|
| TraesCS7A01G541200 | Protein kinase family protein            |
| TraesCS7A01G541300 | Disease resistance protein RPM1          |
| TraesCS7A01G541400 | receptor kinase 1                        |
| TraesCS7A01G541500 | transmembrane protein, putative (DUF594) |
| TraesCS7A01G541600 | Zinc finger-like protein                 |
| TraesCS7A01G541700 | Zinc finger family protein               |
| TraesCS7A01G541800 | Zinc finger-like protein                 |
| TraesCS7A01G541900 | Zinc finger-like protein                 |
| TraesCS7A01G542000 | 1,4-dihydroxy-2-naphthoyl-CoA synthase   |
| TraesCS7A01G542100 | Zinc finger-like protein                 |
| TraesCS7A01G542200 | Zinc finger family protein               |
| TraesCS7A01G542300 | Zinc finger-like protein                 |
| TraesCS7A01G542400 | Zinc finger-like protein                 |
| TraesCS7A01G542500 | UPF0496 protein                          |
| TraesCS7A01G542600 | Blue copper protein                      |

|                    |                                             |
|--------------------|---------------------------------------------|
| TraesCS7A01G542700 | Transcription factor                        |
| TraesCS7A01G542800 | Lateral signaling target 2-like protein     |
| TraesCS7A01G542900 | DUF616 protein                              |
| TraesCS7A01G543000 | DDB1-and CUL4-associated factor             |
| TraesCS7A01G543100 | DDB1-and CUL4-associated factor 8           |
| TraesCS7A01G543200 | transmembrane protein, putative (DUF594)    |
| TraesCS7A01G543300 | Basic helix-loop-helix transcription factor |
| TraesCS7A01G543400 | Serine/threonine-protein kinase             |

The predicted genes and their annotations were retrieved from IWGSC (<http://www.wheat-genome.org/>).

Table S2. Primers used in this study.

| Primer set | Nucleotide sequence (5' to 3') | Purpose      | physical location (Mb) |
|------------|--------------------------------|--------------|------------------------|
| 7A-34F     | GCTAGCCTCTATTCTGAAGCGAT        | SSR marker   | 716.39                 |
| 7A-34R     | GATGTCAGACGGGAACATGGTAT        | SSR marker   | 716.39                 |
| 7A-45F     | AGTGCATTGAAATTTACCTGCCG        | InDel marker | 717.17                 |
| 7A-45R     | GGAGGAATTTGCATCTGTACAGC        | InDel marker | 717.17                 |
| 7A-29F     | CGGTTTCACAGCAGAAACAAAGCTACTG   | InDel marker | 717.82                 |
| 7A-29R     | GAAGTGTTTGAAGAAATGACAGACTCGGAC | InDel marker | 717.82                 |
| 7A-12F     | GCCTTGACCTATGACCGTGTTA         | SSR marker   | 720.17                 |
| 7A-12R     | AACAGAAATGTTGGATCGTTTGC        | SSR marker   | 720.17                 |
| 7A-31F     | ATATATGGACAAAGAACAGGCGTGCG     | InDel marker | 720.88                 |
| 7A-31R     | CAATGTTAATCTCCGCGAAACCCATA     | InDel marker | 720.88                 |
| 7A-42F     | TGGAGAGTGGTGGAAAGTGTAAT        | SSR marker   | 721.59                 |
| 7A-42R     | TCCTTTCCTCCTTCTCTCTCTCT        | SSR marker   | 721.59                 |
| 7A-36F     | TCTGAACTTAAGTGAGAGCTGTT        | SSR marker   | 722.44                 |
| 7A-36R     | GCAGAGGTAGGCAGATGGG            | SSR marker   | 722.44                 |
| q543300F   | TTCGACCACCCACAGCAGCA           | qRT-PCR      | No                     |
| q543300R   | TCCACCCGCTTCTTCCTCGA           | qRT-PCR      | No                     |
| TaTubulinF | GAGGCCTCGTGTGGTCGCTTTGT        | qRT-PCR      | No                     |
| TaTubulinR | GCCCAGTTGTTACCCGCACCAGA        | qRT-PCR      | No                     |
